# Supplementary material for: On the Effect of the Nature of Carbon Nanostructures on the Activity of Bifunctional Catalysts Based on Manganese Oxide Nanowires
Source: MDPI journal article supplement (doi:10.3390/catal13091240), 2023-08-26
Supplement: s1 [file s1]

Archive with 1 entries (1 files):
- catalysts-2546880-supplementary.pdf
